# Supplementary material for: Seagrass blue carbon stocks and sequestration rates in the Colombian Caribbean
Source: PubMed Central journal article supplement (PMC8154905; doi:10.1038/s41598-021-90544-5), 2021-05-26
Supplement: 41598_2021_90544_MOESM1_ESM.pdf [file 41598_2021_90544_MOESM1_ESM.pdf]

1 **Seagrass blue carbon stocks and sequestration rates in the Colombian Caribbean**

2 Oscar Serrano<sup>1\*</sup>, Diana Isabel Gómez-López<sup>2</sup>, Laura Sánchez-Valencia<sup>2</sup>, Andres Acosta-Chaparro<sup>2</sup>, Raul Navas-Camacho<sup>2</sup>, Juan

3 González-Corredor<sup>2</sup>, Cristian Salinas<sup>1</sup>, Pere Masque<sup>1,3</sup>, Cesar Bernal<sup>2</sup>, Núria Marbà<sup>4</sup>

4

5

6 **Supplementary Information Figure A.** Mean ( $\pm$  SE) changes in the main components along the seagrass soil cores from the regions  
 7 Alta Guajira, Media Guajira, San Andrés, Tayrona, Cartagena in the Colombian Caribbean. a) Dry bulk density ( $\text{g cm}^{-3}$ ); b) Organic  
 8 matter content (%); c) Cumulative soil organic carbon stocks ( $\text{kg C}_{\text{org}} \text{m}^{-2}$  in 1-m thick); d) grain size particles  $<0.016\text{mm}$  (%); e) grain  
 9 size particles  $> 0.5\text{mm}$  (%); f)  $\delta^{13}\text{C}$  (‰); and g) soil organic carbon content (%).

10

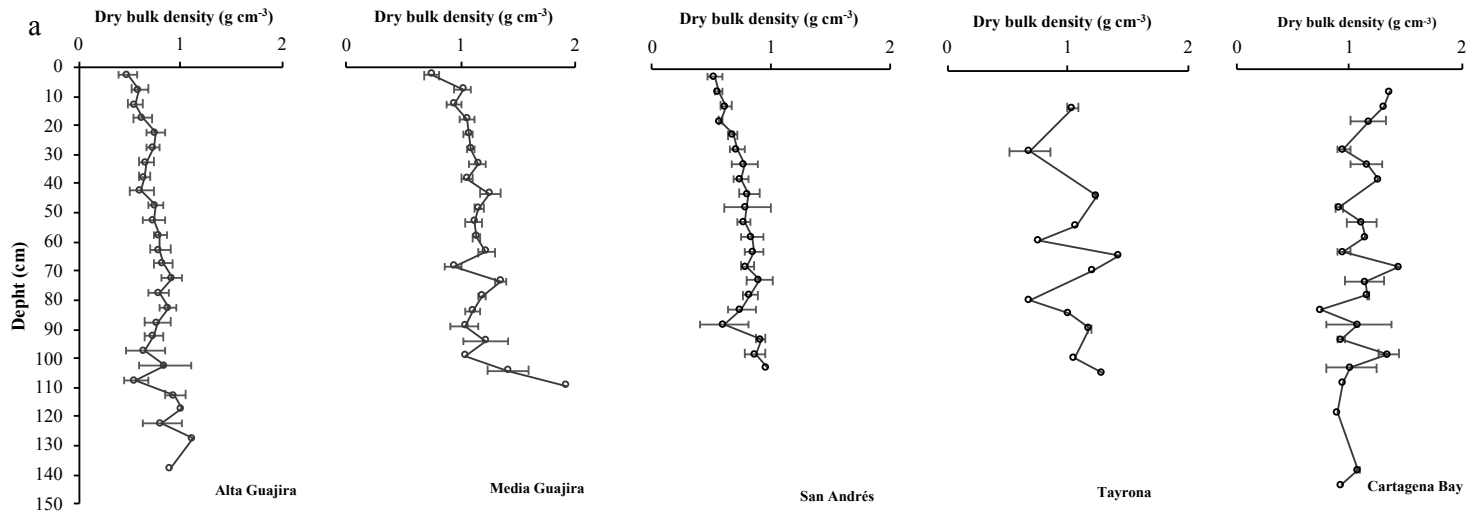

11

12

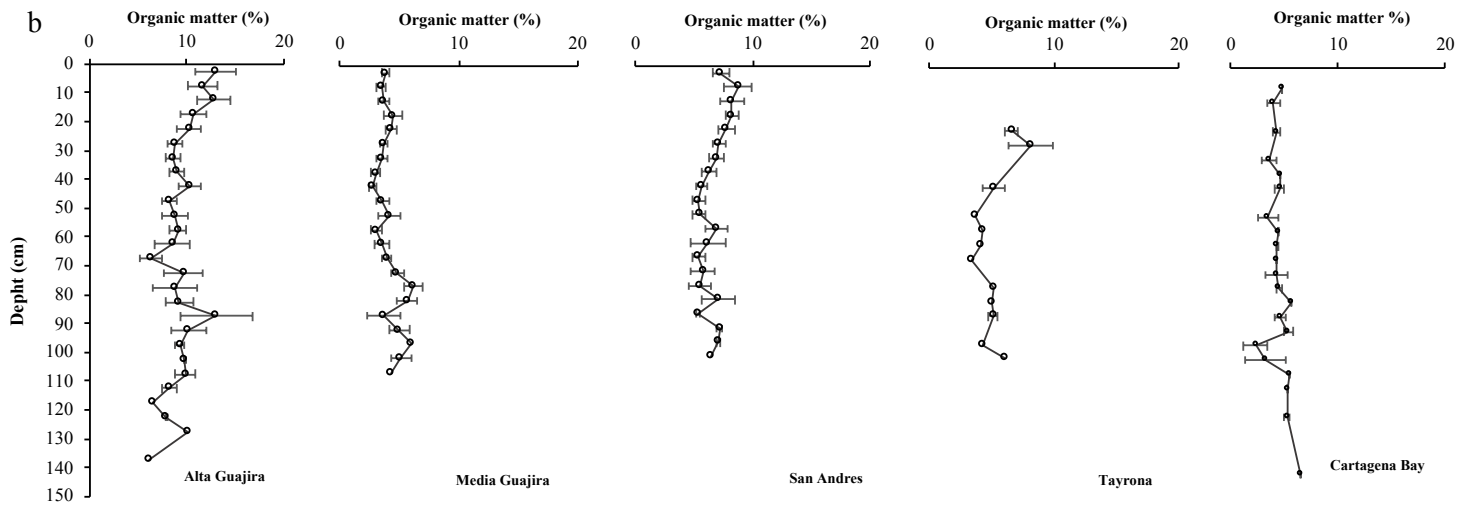

13

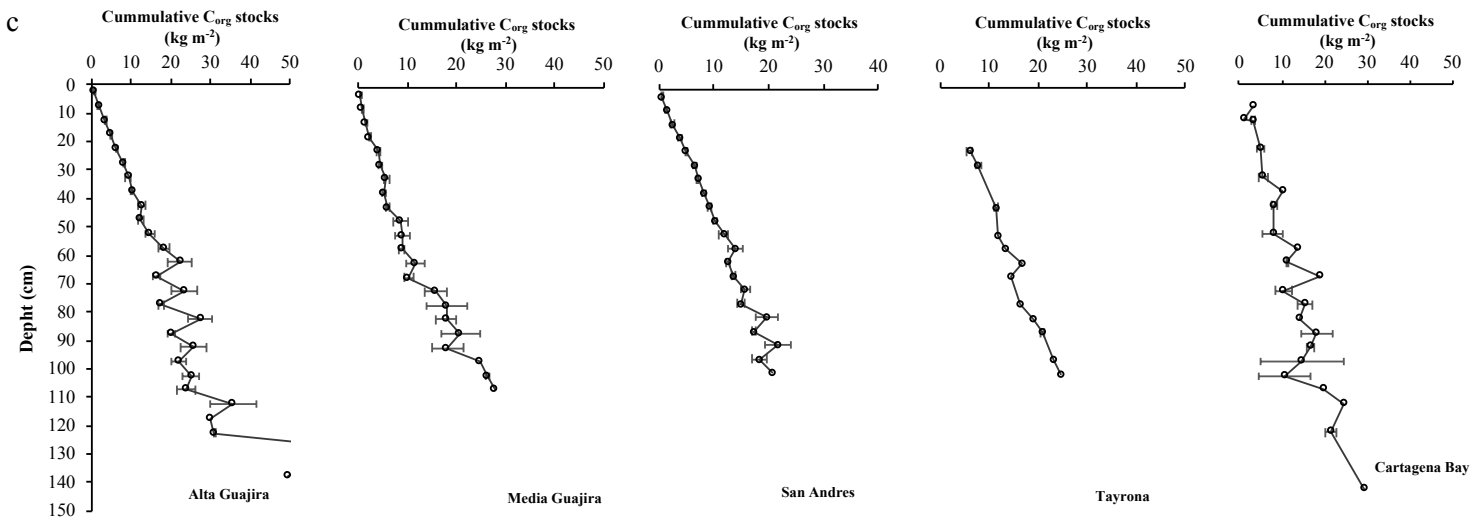

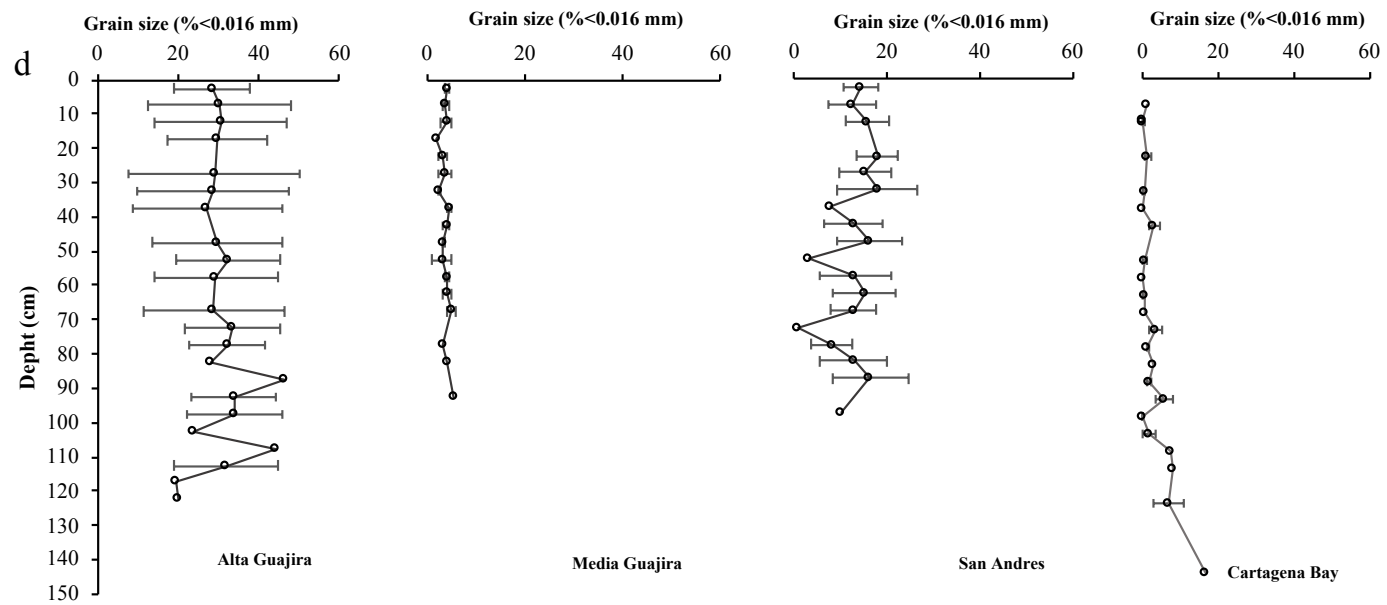

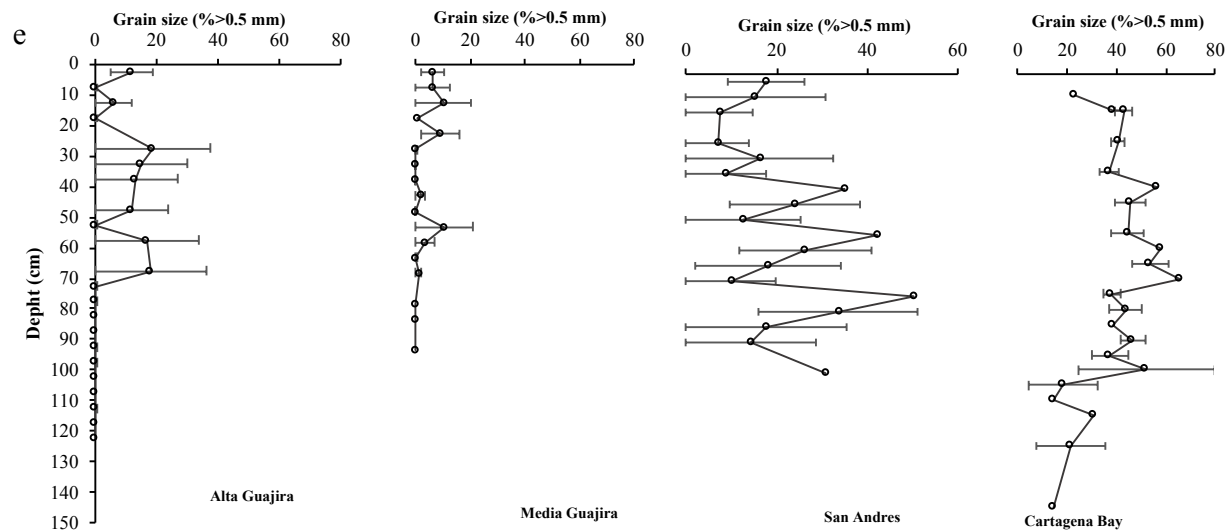

15

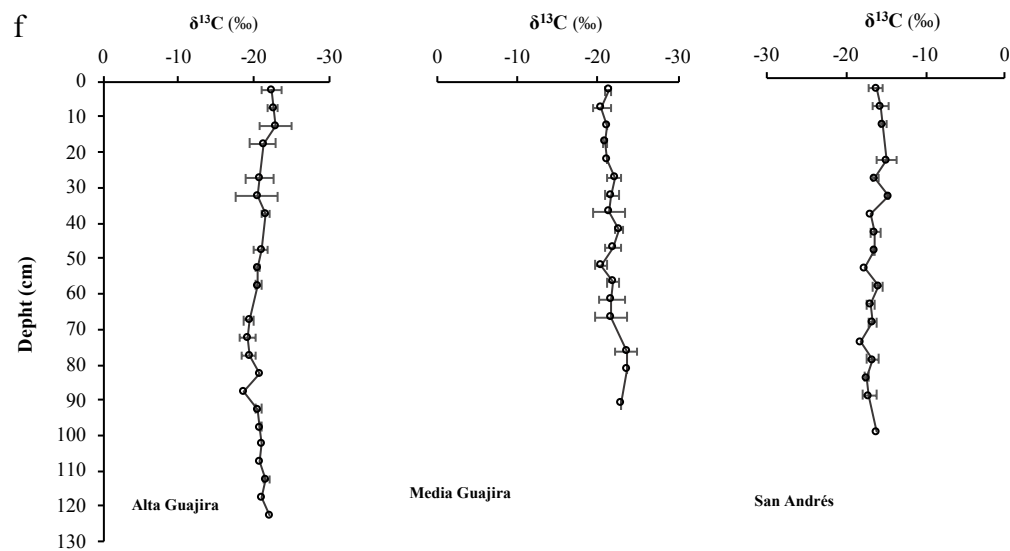

16

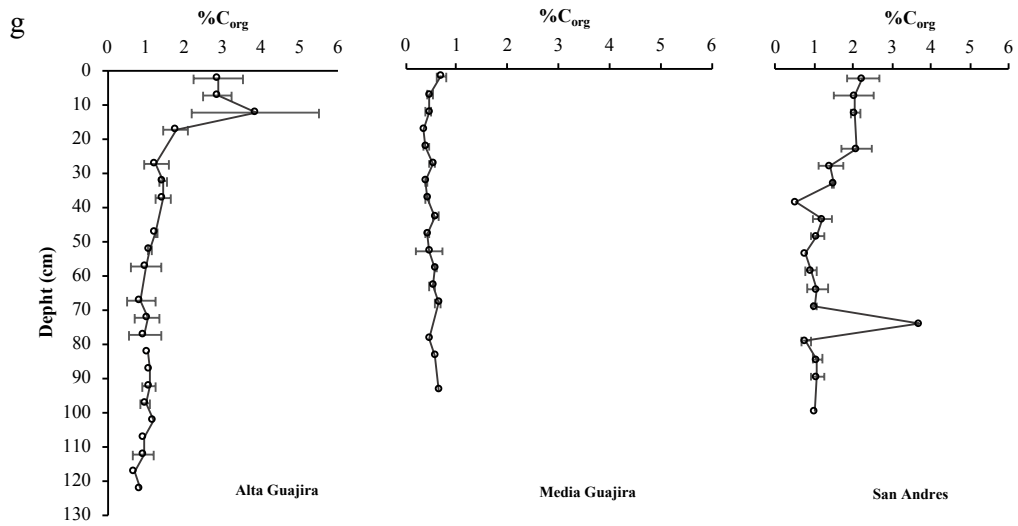

17  
 18  
 19  
 20  
 21  
 22  
 23  
 24

25 **Supplementary Information Figure B.** Relationship between soil organic carbon stocks  
26 measured at 1 m ( $\text{Mg C}_{\text{org}} \text{ha}^{-1}$ ) and extrapolated from 0.65 m to 1 m from cores  $\geq 1$  m-thick.  
27

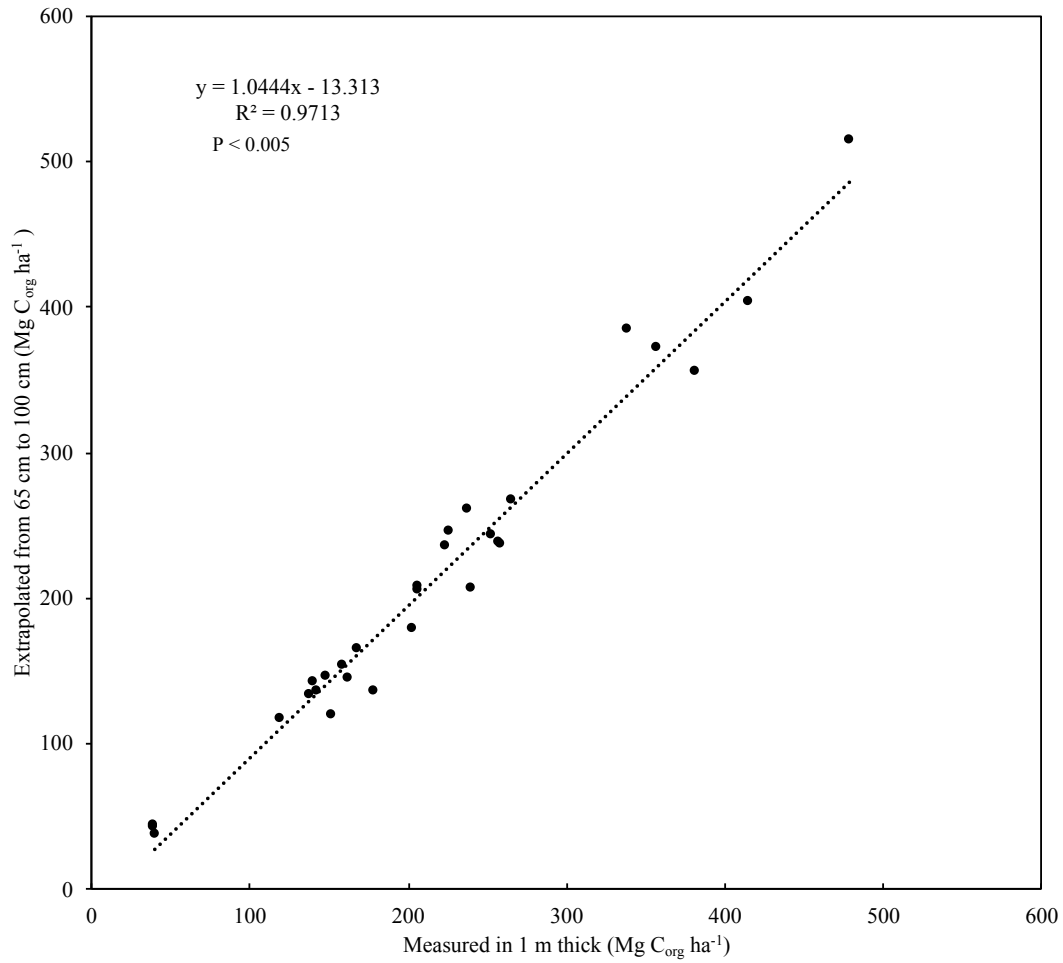

28

29

30 **Supplementary Information Table A.** Details of the seagrass cores sampled, including the % compression during coring operations.

31 Core length corrected for compression (cm decompressed).

32

| Core ID | Region       | Location      | Latitude         | Longitude        | Core length (cm comp.) | Core length (cm decomp.) | Compression (%) |
|---------|--------------|---------------|------------------|------------------|------------------------|--------------------------|-----------------|
| SABHK1  | San Andrés   | Bahía Hooker  | 12° 33' 46.1" N  | 81° 42' 1.22" W  | 73                     | 100                      | 38              |
| SABHK2  |              |               | 12° 33' 46.1" N  | 81° 42' 1.22" W  | 69                     | 94                       | 36              |
| SABHK3  |              |               | 12° 33' 46.1" N  | 81° 42' 1.22" W  | 72                     | 96                       | 33              |
| SACC1   |              | Cotton Cay    | 12° 11' 50.5" N  | 72° 08' 56.7" W  | 63                     | 87                       | 38              |
| SACC2   |              |               | 12° 11' 50.5" N  | 72° 08' 56.7" W  | 54                     | 73                       | 34              |
| SACC3   |              |               | 12° 12' 10.88" N | 72° 09' 7.27" W  | 48                     | 65                       | 39              |
| SAMA1   |              | Mar Azul      | 12° 12' 10.88" N | 72° 09' 7.27" W  | 58                     | 83                       | 44              |
| SAMA2   |              |               | 12° 12' 10.88" N | 72° 09' 7.27" W  | 60                     | 84                       | 40              |
| SAMA3   |              |               | 12° 33' 31.41" N | 81° 42' 4.82" W  | 40                     | 56                       | 60              |
| AGBH1   | Alta Guajira | Bahía Hondita | 12° 33' 31.41" N | 81° 42' 4.82" W  | 66                     | 93                       | 41              |
| AGBH2   |              |               | 12° 33' 31.41" N | 81° 42' 4.82" W  | 60                     | 85                       | 51              |
| AGBH3   |              |               | 11° 19' 3.53" N  | 74° 08' 1.87" W  | 95                     | 124                      | 30              |
| AGBH4   |              |               | 11° 19' 14.44" N | 74° 07' 35.41" W | 90                     | 127                      | 19              |
| AGHB5   |              |               | 11° 19' 14.44" N | 74° 07' 35.41" W | 96                     | 136                      | 21              |
| AGBH6   |              |               | 12° 03' 51.7" N  | 72° 09' 27.0" W  | 86                     | 114                      | 33              |
| AGBH7   |              |               | 11° 19' 3.53" N  | 74° 08' 1.87" W  | 58                     | 82                       | 52              |
| AGBH8   |              |               | 12° 03' 51.7" N  | 72° 09' 27.0" W  | 50                     | 71                       | 59              |



|        |                        |                  |                  |    |     |    |
|--------|------------------------|------------------|------------------|----|-----|----|
| AGBP1  | Bahía Portete          | 12° 03' 51.7" N  | 72° 09' 27.0" W  | 40 | 65  | 61 |
| AGBHP2 |                        | 11° 56' 15.6" N  | 72° 12' 49.6" W  | 45 | 70  | 56 |
| AGBHP3 |                        | 11° 56' 15.6" N  | 72° 12' 49.6" W  | 48 | 73  | 53 |
| AGBHP4 |                        | 11° 56' 15.6" N  | 72° 12' 49.6" W  | 38 | 64  | 67 |
| AGBHP5 |                        | 11° 56' 14.24" N | 72° 12' 50.84" W | 41 | 66  | 61 |
| AGCV1  | Cabo de la Vela        | 11° 56' 14.24" N | 72° 12' 50.84" W | 71 | 94  | 33 |
| AGCV2  |                        | 11° 56' 14.24" N | 72° 12' 50.84" W | 51 | 70  | 36 |
| AGCV3  |                        | 11° 56' 08.5" N  | 72° 12' 52.6" W  | 30 | 45  | 51 |
| AGCV4  |                        | 11° 56' 08.5" N  | 72° 12' 52.6" W  | 46 | 65  | 40 |
| AGCV5  |                        | 11° 56' 08.5" N  | 72° 12' 52.6" W  | 38 | 61  | 61 |
| MGCZ1  | Media Guajira Carrizal | 10° 23' 52" N    | 75° 32' 31" W    | 76 | 92  | 21 |
| MGCZ2  |                        | 10° 15' 53" N    | 75° 35' 32" W    | 67 | 83  | 24 |
| MGCZ3  |                        | 10° 15' 53" N    | 75° 35' 32" W    | 90 | 107 | 19 |
| MGCZ4  |                        | 10° 19' 12" N    | 75° 35' 17" W    | 47 | 69  | 48 |
| MGCZ5  |                        | 10° 15' 53" N    | 75° 35' 32" W    | 47 | 69  | 46 |
| MGCZ6  |                        | 10° 19' 12" N    | 75° 35' 17" W    | 46 | 68  | 47 |
| MGCZ7  |                        | 10° 19' 12" N    | 75° 35' 17" W    | 61 | 87  | 43 |
| MGCZ8  |                        | 10° 23' 52" N    | 75° 32' 31" W    | 65 | 84  | 30 |
| MGCZ9  |                        | 10° 23' 52" N    | 75° 32' 31" W    | 70 | 83  | 19 |
| MGCZ10 |                        | 10° 22' 46" N    | 75° 34' 22" W    | 48 | 72  | 50 |
| MGCZ11 |                        | 10° 22' 46" N    | 75° 34' 22" W    | 39 | 62  | 59 |
| MGCZ12 |                        | 10° 22' 46" N    | 75° 34' 22" W    | 40 | 62  | 55 |
| MGMC1  | Musichi                | 10° 21' 57" N    | 75° 32' 50" W    | 65 | 91  | 39 |
| MGMC2  |                        | 10° 21' 57" N    | 75° 32' 50" W    | 59 | 84  | 43 |
| MGMC3  |                        | 10° 21' 57" N    | 75° 32' 50" W    | 68 | 89  | 31 |

|       |           |               |                  |                  |     |     |    |
|-------|-----------|---------------|------------------|------------------|-----|-----|----|
| SMCH1 | Tayrona   | Bahía Chengue | 12° 24' 56.9" N  | 71° 42' 45.1" W  | 52  | 76  | 46 |
| SMCH2 |           |               | 12° 24' 56.9" N  | 71° 42' 45.1" W  | 62  | 83  | 34 |
| SMCH3 |           |               | 12° 25' 04.8" N  | 71° 42' 28.9" W  | 92  | 103 | 12 |
| SMCH4 |           |               | 12° 25' 04.8" N  | 71° 42' 28.9" W  | 90  | 97  | 8  |
| CLV1  | Cartagena | La Virgen     | 12° 25' 04.8" N  | 71° 42' 28.9" W  | 81  | 114 | 41 |
| CLV2  |           |               | 12° 25' 45.1" N  | 71° 41' 37.6" W  | 67  | 95  | 41 |
| CLV3  |           |               | 12° 25' 45.1" N  | 71° 41' 37.6" W  | 70  | 102 | 45 |
| CTTB1 |           | Tierra Bomba  | 12° 25' 45.1" N  | 71° 41' 37.6" W  | 91  | 117 | 28 |
| CTTB2 |           |               | 12° 34' 31.52" N | 81° 41' 38.09" W | 120 | 156 | 30 |
| CTTB3 |           |               | 12° 34' 31.52" N | 81° 41' 38.09" W | 109 | 133 | 22 |
| CTPA1 |           | Punta Arena   | 12° 34' 31.52" N | 81° 41' 38.09" W | 80  | 110 | 38 |
| CTPA2 |           |               | 11° 44' 56.62" N | 72° 35' 38.76" W | 100 | 125 | 25 |
| CTPA3 |           |               | 11° 44' 56.62" N | 72° 35' 38.76" W | 86  | 112 | 31 |
| CTBC1 |           | Bahia Cocon   | 11° 44' 56.62" N | 72° 35' 38.76" W | 79  | 109 | 38 |
| CTBC2 |           |               | 12° 10' 30.12" N | 71° 57' 37.83" W | 76  | 86  | 13 |
| CTBC3 |           |               | 12° 10' 30.12" N | 71° 57' 37.83" W | 108 | 108 | 0  |
| CTBG1 |           | Bocagrande    | 12° 10' 30.12" N | 71° 57' 37.83" W | 114 | 129 | 13 |
| CTBG2 |           |               | 12° 09' 53.6" N  | 71° 58' 5.01" W  | 110 | 117 | 7  |
| CTBG3 |           |               | 12° 09' 53.6" N  | 71° 58' 5.01" W  | 88  | 92  | 4  |

34 **Supplementary Information Table B.** Radiocarbon results of the soil organic carbon in seagrass cores sampled in the Colombian  
 35 Caribbean.

36

| DirectAMS<br>code | Core ID | Region        | Location      | Depth (cm<br>decompressed) | Radiocarbon age |                 |
|-------------------|---------|---------------|---------------|----------------------------|-----------------|-----------------|
|                   |         |               |               |                            | BP              | 1sigma<br>error |
| D-AMS 031357      | SABH1   | San Andrés    | Bahía Hooker  | 45                         | 400             | 26              |
| D-AMS 031358      | SABH1   | San Andrés    | Bahía Hooker  | 66                         | 414             | 27              |
| D-AMS 031359      | SABH1   | San Andrés    | Bahía Hooker  | 93                         | 479             | 25              |
| D-AMS 031360      | SACC1   | San Andrés    | Cotton Cay    | 47                         | <i>Modern</i>   |                 |
| D-AMS 031361      | SACC1   | San Andrés    | Cotton Cay    | 59                         | 81              | 26              |
| D-AMS 031362      | SACC1   | San Andrés    | Cotton Cay    | 76                         | 401             | 24              |
| D-AMS 031364      | MGCZ10  | Media Guajira | Carrizal      | 55                         | 1304            | 27              |
| D-AMS 031365      | MGCZ10  | Media Guajira | Carrizal      | 64                         | 972             | 25              |
| D-AMS 031366      | MGCZ4   | Media Guajira | Carrizal      | 48                         | 87              | 26              |
| D-AMS 031367      | MGCZ4   | Media Guajira | Carrizal      | 55                         | 281             | 27              |
| D-AMS 031368      | MGCZ4   | Media Guajira | Carrizal      | 63                         | 315             | 24              |
| D-AMS 031371      | SAMA1   | San Andrés    | Mar Azul      | 79                         | 517             | 31              |
| D-AMS 031373      | MGMC1   | Media Guajira | Musichi       | 66                         | 2184            | 40              |
| D-AMS 031374      | MGMC1   | Media Guajira | Musichi       | 80                         | 3017            | 32              |
| D-AMS 031375      | AGBH3   | Alta Guajira  | Bahía Hondita | 42                         | 1430            | 29              |
| D-AMS 031376      | AGBH3   | Alta Guajira  | Bahía Hondita | 75                         | 2333            | 32              |
| D-AMS 031377      | AGBH3   | Alta Guajira  | Bahía Hondita | 114                        | 2560            | 41              |

37

38 **Supplementary Information Table C.** Mean ( $\pm$  SD) stable carbon isotopes ( $\delta^{13}\text{C}$ , (‰) in seagrass, mangrove, seston and *Halimeda*  
 39 *tuna* (mean and SD) across the regions studied in the Colombian Caribbean.

40

| Region        | Source               | $\delta^{13}\text{C}$ (‰) |     |
|---------------|----------------------|---------------------------|-----|
|               |                      | mean                      | SD  |
| Alta Guajira  | Seagrass             | -10.7                     | 1.1 |
|               | Mangrove             | -29.0                     | 0.1 |
|               | Seston               | -30.6                     | 0.5 |
| Media Guajira | Seagrass             | -9.1                      | 0.5 |
|               | Seston               | -27.8                     | 3.7 |
| San Andrés    | Seagrass             | -8.3                      | 0.5 |
|               | Seston               | -25.0                     | 4.1 |
|               | <i>Halimeda tuna</i> | -17.0                     | 0.1 |
| Tayrona       | Seagrass             | -8.9                      | 1.2 |
|               | Mangrove             | -29.0                     | 0.1 |
|               | Seston               | -28.9                     | 3.1 |
| Cartagena Bay | Seagrass             | -8.9                      | 1.2 |
|               | Mangrove             | -29.0                     | 0.1 |
|               | Seston               | -28.9                     | 3.1 |

41
